# Supplementary material for: Effects of Erythrodiol on the Antioxidant Response and Proteome of HepG2 Cells
Source: MDPI journal article supplement (doi:10.3390/antiox11010073), 2021-12-29
Supplement: s1 [file s1]

**Supplementary Table S1.** Gene ontology analysis of proteins only detected after incubation with EO.

|                                                | GO #    | <i>p</i> value | Genes related                                                                                                    |
|------------------------------------------------|---------|----------------|------------------------------------------------------------------------------------------------------------------|
| <b>Molecular functions</b>                     |         |                |                                                                                                                  |
| Catalytic activity                             | 0003824 | 0.001          | MCM5,UCHL5,ALDOC,CTBP1,NAA15,PGP,PLOD1,DYNC1I2,TRMT6,ADSL,MASTL,PUS7,ADSS,STK26,CKAP5,GLUL,GSS,PPP1CB,TPP2       |
| Magnesium ion binding                          | 0000287 | 0.002          | PGP,ADSS,STK26,GLUL,GSS                                                                                          |
| Ligase activity, forming carbon-nitrogen bonds | 0016879 | 0.011          | ADSS,GLUL,GSS                                                                                                    |
| Dynein light chain binding                     | 0045503 | 0.021          | DYNC1I2,GLUL                                                                                                     |
| <b>Biological processes</b>                    |         |                |                                                                                                                  |
| “de novo” AMP biosynthetic process             | 0044208 | 0.004          | ADSL,ADSS                                                                                                        |
| AMP biosynthetic process                       | 0006167 | 0.021          | ADSL,ADSS                                                                                                        |
| G2/M transition of mitotic cell cycle          | 0000086 | 0.034          | DYNC1I2,MASTL,RCC2,CKAP5,PPP1CB                                                                                  |
| Cell cycle G2/M phase transition               | 0044839 | 0.042          | DYNC1I2,MASTL,RCC2,CKAP5,PPP1CB                                                                                  |
| <b>Cellular components</b>                     |         |                |                                                                                                                  |
| Cytosol                                        | 0005829 | 0.001          | MCM5,UCHL5,ALDOC,VASP,CD2BP2,ARID3A,EIF3M,NAA15,DYNC1I2,ADSL,ADSS,RCC2,STK26,CKAP5,GLUL,GSS,PPP1CB,TPP2,TPP1,BCA |
| Nuclear chromosome                             | 0000228 | 0.033          | MCM5,UCHL5                                                                                                       |
| <b>KEGG pathways</b>                           |         |                |                                                                                                                  |
| Alanine, aspartate and glutamate metabolism    | 00250   | 0.007          | ADSL,ADSS,GLUL                                                                                                   |
| <b>REAC pathways</b>                           |         |                |                                                                                                                  |

|                                                        |                     |        |                                                                                                                                                             |
|--------------------------------------------------------|---------------------|--------|-------------------------------------------------------------------------------------------------------------------------------------------------------------|
| Purine ribonucleoside<br>monophosphate<br>biosynthesis | R-HSA-73817         | 0.045  | ADSL,ADSS                                                                                                                                                   |
| <b>Wiki pathways</b>                                   |                     |        |                                                                                                                                                             |
| Purine metabolism                                      | WP4792              | 0.037  | ADSL,ADSS                                                                                                                                                   |
| <b>Transcription factors motifs</b>                    |                     |        |                                                                                                                                                             |
| E2F-3:FOXI1                                            | M08208              | 0.0149 | MCM5,UCHL5,ALDOC,VASP,CTBP1,CD2BP2,ARID3A,EIF3M,NAA<br>15,PGP,PLOD1,DYNC1I2,TRMT6,ADSL,MASTL,PUS7,ADSS,RCC2,S<br>TK26,CKAP5,SREK1,GLUL,GSS,PPP1CB,TPP2,TBCA |
| EHF                                                    | M02052_1            | 0.022  | MCM5,UCHL5,VASP,CTBP1,CD2BP2,EIF3M,PGP,DYNC1I2,TRMT6,<br>ADSL,MASTL,ADSS                                                                                    |
| <b>miRNA motifs</b>                                    |                     |        |                                                                                                                                                             |
| hsa-miR-6883-3p                                        | hsa-miR-6883-<br>3p | 0.019  | UCHL5,ALDOC                                                                                                                                                 |
| has-miR-454-5p                                         | hsa-miR-454-5p      | 0.020  | UCHL5,ALDOC                                                                                                                                                 |

**Supplementary Table S2.** Gene ontology analysis of proteins not detected or detected at decreased levels after incubation with EO.

|                                                   | GO #    | <i>p</i><br>value | Genes related                                                                                                                                            |
|---------------------------------------------------|---------|-------------------|----------------------------------------------------------------------------------------------------------------------------------------------------------|
| <b>Molecular functions</b>                        |         |                   |                                                                                                                                                          |
| Heterocyclic compound binding                     | 1901363 | 0.002             | RHOG,GRPEL1,IARS2,DNAJA3,MSH2,TRA2A,TAF15,ERH,MRPS23,SA<br>RS2,RANBP2,WDR33,MRTO4,CYB5A,IVD,NRAS,PES1,CTPS2,OGDH,S<br>UB1,RAB21,RBM17,RHOT2,SDHA,CARHSP1 |
| Organic cyclic compound binding                   | 0097159 | 0.0023            | RHOG,GRPEL1,IARS2,DNAJA3,MSH2,TRA2A,TAF15,ERH,MRPS23,SA<br>RS2,RANBP2,WDR33,MRTO4,CYB5A,IVD,NRAS,PES1,CTPS2,OGDH,S<br>UB1,RAB21,RBM17,RHOT2,SDHA,CARHSP1 |
| RNA binding                                       | 0003723 | 0.0034            | IARS2,TRA2A,TAF15,ERH,MRPS23,SARS2,RANBP2,WDR33,MRTO4                                                                                                    |
| Peptidyl-aspartic acid 3-<br>dioxygenase activity | 0062101 | 0.0219            | ASPH                                                                                                                                                     |
| Nucleotide binding                                | 0000166 | 0.0249            | RHOG,GRPEL1,IARS2,DNAJA3,MSH2,ERH,SARS2,IVD,NRAS,CTPS2,R<br>AB21,RHOT2,SDHA                                                                              |
| Nucleoside phosphate binding                      | 1901265 | 0.0251            | RHOG,GRPEL1,IARS2,DNAJA3,MSH2,ERH,SARS2,IVD,NRAS,CTPS2,R<br>AB21,RHOT2,SDHA                                                                              |
| Small molecule binding                            | 0036094 | 0.0251            | RHOG,GRPEL1,IARS2,DNAJA3,MSH2,ERH,SARS2,IVD,NRAS,CTPS2,O<br>GDH,RAB21,RHOT2,SDHA                                                                         |
| <b>Biological processes</b>                       |         |                   |                                                                                                                                                          |
| Generation of precursor metabolites and energy    | 0006091 | 0.012             | ASPH,NUP43,MSH2,RANBP2,CYB5A,DLAT,OGDH,SDHA                                                                                                              |
| Carboxylic acid metabolic process                 | 0019752 | 0.023             | IARS2,NUP43,SARS2,RANBP2,CYB5A,DLAT,IVD,CTPS2,OGDH                                                                                                       |
| Oxoacid metabolic process                         | 0043436 | 0.029             | IARS2,NUP43,SARS2,RANBP2,CYB5A,DLAT,IVD,CTPS2,OGDH                                                                                                       |
| Organic acid metabolic process                    | 0006082 | 0.037             | IARS2,NUP43,SARS2,RANBP2,CYB5A,DLAT,IVD,CTPS2,OGDH                                                                                                       |
| <b>Cellular components</b>                        |         |                   |                                                                                                                                                          |
| Mitochondrion                                     | 0005739 | 0.0007            | GRPEL1,IARS2,DNAJA3,MRPS23,SARS2,RANBP2,CYB5A,DLAT,IVD,O<br>GDH,BCAP31,RHOT2,SDHA                                                                        |
| Membrane-enclosed lumen                           | 0031974 | 0.0007            | ASPH,GRPEL1,IARS2,DNAJA3,NUP43,MSH2,TRA2A,TAF15,ANAPC7,S<br>ARS2,RANBP2,WDR33,MRTO4,GNS,RCL1                                                             |

|                                                                |              |        |                                                                                                                                                                                       |
|----------------------------------------------------------------|--------------|--------|---------------------------------------------------------------------------------------------------------------------------------------------------------------------------------------|
| Intracellular organelle lumen                                  | 0070013      | 0.0008 | ASPH,GRPEL1,IARS2,DNAJA3,NUP43,MSH2,TRA2A,TAF15,ANAPC7,SARS2,RANBP2,WDR33,MRTO4,GNS,RCL1                                                                                              |
| Organelle lumen                                                | 0043233      | 0.0008 | ASPH,GRPEL1,IARS2,DNAJA3,NUP43,MSH2,TRA2A,TAF15,ANAPC7,SARS2,RANBP2,WDR33,MRTO4,GNS,RCL1                                                                                              |
| Mitochondrial matrix                                           | 0005759      | 0.0009 | GRPEL1,IARS2,DNAJA3,SARS2,DLAT,IVD,OGDH                                                                                                                                               |
| Intracellular membrane-bound organelle                         | 0043231      | 0.009  | ASPH,RHOG,GRPEL1,IARS2,DNAJA3,NUP43,MSH2,TRA2A,TAF15,ERH,MRPS23,ANAPC7,SARS2,RANBP2,WDR33,MRTO4,GNS,RCL1,SGTA,CYB5A,DLAT,IVD,NRAS,PES1,OGDH,SUB1,TMED10,RAB21,RBM17,BCAP31,RHOT2,SDHA |
| <b>KEGG pathways</b>                                           |              |        |                                                                                                                                                                                       |
| Citrate cycle (TCA cycle)                                      | 00020        | 0.0167 | DLAT,OGDH,SDHA                                                                                                                                                                        |
| <b>REAC pathways</b>                                           |              |        |                                                                                                                                                                                       |
| Transport of mature mRNA derived from an intronless transcript | R-HSA-159231 | 0.006  | NUP43,RANBP2,WDR33                                                                                                                                                                    |
| Transport of mature mRNA derived from intronless transcripts   | R-HSA-159234 | 0.0067 | NUP43,RANBP2,WDR33                                                                                                                                                                    |
| <b>Wiki pathways</b>                                           |              |        |                                                                                                                                                                                       |
| TCA cycle and deficiency of pyruvate dehydrogenase             | WP2453       | 0.0042 | DLAT,OGDH,SDHA                                                                                                                                                                        |
| <b>Transcription factors motifs</b>                            |              |        |                                                                                                                                                                                       |
| E2F-4                                                          | M07084       | 0.002  | ASPH,RHOG,GRPEL1,IARS2,DNAJA3,NUP43,MSH2,TRA2A,TAF15,ERH,MRPS23,ANAPC7,SARS2,RANBP2,WDR33,MRTO4,GNS,RCL1,SGTA,CYB5A,DLAT,IVD,NPTN                                                     |
| <b>miRNA motifs</b>                                            |              |        |                                                                                                                                                                                       |
| hsa-miR-6081                                                   | hsa-miR-6081 | 0.032  | ASPH,RHOG                                                                                                                                                                             |
